1 Diversity and composition of cave methanotrophic communities

2

3 Kevin D. Webster,<sup>a\*</sup># Arndt Schimmelmann,<sup>a</sup> Agnieszka Drobnik,<sup>b</sup> Maria Mastalerz,<sup>b</sup>

4 Laura Rosales Lagarde,<sup>c</sup> Penelope J. Boston,<sup>d</sup> Jay T. Lennon,<sup>e#</sup>

5

6 <sup>a</sup>Department of Earth and Atmospheric Sciences, Indiana University, Bloomington,

7 Indiana, USA.

8 <sup>b</sup>Indiana Geological and Water Survey, Indiana University, Bloomington, Indiana, USA.

9 <sup>c</sup>Department of Physical and Life Sciences, Nevada State College, School of Liberal Arts

10 and Sciences, Henderson, Nevada, USA.

11 <sup>d</sup>NASA Astrobiology Institute, NASA Ames Research Center, Moffett Field, California,

12 USA.

13 <sup>e</sup>Department of Biology, Indiana University, Bloomington, Indiana, USA.

14 \*Present address: Kevin D. Webster, Planetary Science Institute, Tucson, AZ, USA.

15 #Address correspondence to Kevin D. Webster, [webster@psi.edu](mailto:webster@psi.edu), or Jay T. Lennon,

16 [lennonj@indiana.edu](mailto:lennonj@indiana.edu).

17

18

19 **ABSTRACT** Methane oxidizing microorganisms (methanotrophs) are a major sink for the  
20 greenhouse gas methane (CH<sub>4</sub>), and have been investigated in several environments.  
21 Recent studies show that CH<sub>4</sub> consumption in caves is pervasive and is a result of active  
22 methanotrophy. However, little is known about what controls the distribution and  
23 abundance of methanotrophs in caves. We sampled 42 sediments from 21 caves in North  
24 America to elucidate the factors shaping cave methanotroph communities. We  
25 hypothesized that cave methanotroph communities should be related to cave-air CH<sub>4</sub>  
26 concentrations and exhibit dispersal-limited biogeographical patterns due to the insular  
27 nature of caves. Using 16S rRNA sequencing, we recovered methanotrophs from 88 % of  
28 samples collected, including locations in caves where CH<sub>4</sub> concentrations were at or below  
29 detection limits ( $\leq 0.3$  ppmv). Methanotrophs from the Methylocystaceae (Type II) were  
30 the dominant methanotrophs as has been seen in other environments with low CH<sub>4</sub>  
31 concentrations. Despite being insular ecosystems, we found that the composition of  
32 methanotrophs did not vary with distance, both within and among caves. Instead, we found  
33 evidence for a core microbiome, perhaps suggesting that high-affinity methanotrophs are  
34 not dispersal limited. Additionally, we observed that the relative abundance of  
35 methanotrophs was positively related the proportion of gravel in cave sediments and the  
36 relative abundance of methylotrophs. Last, we found that the relative abundance of  
37 methanotrophs was inversely correlated with cave-air CH<sub>4</sub> concentrations. Our results  
38 suggest that methanotrophs in caves have influences on cave biogeochemistry beyond CH<sub>4</sub>  
39 oxidation and that high-affinity methanotrophs may disperse easily into caves.

40

41 **IMPORTANCE** Recent observations have shown that the atmospheric greenhouse gas  
42 methane (CH<sub>4</sub>) is consumed by microorganisms (methanotrophs) in caves at rates  
43 comparable to CH<sub>4</sub> oxidation in surface soils. Caves are abundant in karst landscapes that  
44 comprise 14 % of Earth's land surface area, and therefore may be acting as a substantial  
45 CH<sub>4</sub> sink. A detailed ecological understanding of the forces that shape methanotrophic  
46 communities in caves is lacking. We sampled cave sediments to better understand the  
47 community composition and structure of cave methanotrophs. Our results show that the  
48 relative abundance of methanotrophs was negatively correlated with CH<sub>4</sub> concentrations in  
49 cave air and that methanotrophic communities were similar to each other over distances of  
50 10s of m to 100s of km.

51

52 **KEYWORDS** Biogeography; Cave; Greenhouse Gas; Karst; Methane; Methanotroph;

53

## 54 **INTRODUCTION**

55 Methane (CH<sub>4</sub>) is a greenhouse gas in Earth's atmosphere, an energy source for  
56 humanity, and has been observed in the atmosphere of Mars (1–3). Thus, enhancing the  
57 knowledge of the pathways that add and remove CH<sub>4</sub> to and from Earth's atmosphere has  
58 implications for several fields. Two major processes are responsible for the removal of  
59 CH<sub>4</sub> from Earth's atmosphere. Oxidation by hydroxyl radicals accounts for 90 % of  
60 atmospheric-CH<sub>4</sub> removal and methane-consuming microorganisms (i.e., methanotrophs)  
61 in surface soils account for an additional 5 % (4). Despite the influence that methanotrophs  
62 have on regulating Earth's climate, gaps in our understanding of these organisms, like how

63 they respond to changing CH<sub>4</sub> concentrations or how they disperse through the  
64 environment, remain (2, 3).

65         Rocks that host caves are widespread on Earth, have been observed on other  
66 planets, and are emerging as a global CH<sub>4</sub> sink (7–10) (Figure 1). The relative importance  
67 of deterministic and stochastic factors responsible for shaping the methanotroph  
68 community in caves is unknown (7, 9, 11–14). Observations of atmospheric CH<sub>4</sub>  
69 consumption in caves suggest that high-affinity or Type II methanotrophs may be present in  
70 cave environments. These organisms have broad phylogenetic affiliations (15–20), i.e. are  
71 known from the Methylocystaceae, as well as several groups in clades affiliated with  
72 upland soils (upland soil cluster methanotrophs). They tend to be the most prominent  
73 members of the methanotrophic community in environments with low CH<sub>4</sub> concentrations  
74 and high O<sub>2</sub> concentrations. They are less common in environments with high CH<sub>4</sub> and  
75 low O<sub>2</sub> concentrations, like lakes or geological seeps, which are dominated by  
76 methanotrophs from the Methylococcales (Type I methanotrophs) (21, 22).

77         The factors that control the distribution and abundance of methanotrophs in caves  
78 are unknown. Previous work has shown that methanotrophs are frequently related to CH<sub>4</sub>  
79 concentrations, sediment texture, and other microorganisms, but it is unknown how these  
80 factors influence methanotroph communities in caves. Type I and Type II methanotrophs  
81 are known to exhibit niche partitioning between high and low CH<sub>4</sub> subenvironments  
82 respectively (22, 23). However, it is unknown if Type II methanotrophs show similar  
83 deterministic changes in community composition with atmospheric to subatmospheric CH<sub>4</sub>  
84 concentration gradients. Methanotrophs have also been shown to be more abundant in  
85 clay-rich soils even though these soils may limit the diffusion of oxygen (24–26). Prior

86 work has documented associations between methanotroph and methylotroph abundances in  
87 aquatic environments (18), and that methanotrophs interact with other microbial species  
88 through volatile compounds in co-cultures (27).

89         Almost nothing is known about the importance of biogeography in structuring  
90 high-affinity methanotroph communities. Previous observations have shown that  
91 methanotrophs from Hawai'i exhibited close taxonomic affiliations with Arctic  
92 methanotrophs (5). This suggests that these organisms may be able to readily disperse  
93 through the environment. However, biota in caves are typically unique due to their  
94 isolation from other environments (28, 29). Thus, it may be possible that dispersal  
95 limitation is important in structuring high-affinity methanotrophic communities in caves.

96         We sampled 21 caves in North America, analyzed the 16S rRNA gene, and  
97 developed the following hypotheses to examine the factors regulating the community  
98 composition of cave methanotrophs (Figure 1). First, we hypothesized that that their  
99 community structure should mirror the structure of methanotrophic communities in other  
100 low CH<sub>4</sub> environments, and that methanotroph abundance should be correlated with cave-  
101 air CH<sub>4</sub> concentrations. Additionally, we hypothesized that methanotrophs should show  
102 relationships to sediment texture and other microorganisms in the environment. Finally, we  
103 hypothesized that high-affinity methanotroph communities in caves should be dispersal-  
104 limited due to the insular nature of caves.

105

## 106 **RESULTS**

107           **Methanotroph community structure.** Methanotrophs were recovered in 88 % of  
108 the cave-sediment samples including locations where the CH<sub>4</sub> concentrations were at or  
109 below our instrumental detection limits of  $\leq 0.3$  ppmv (Supplemental Table 1). In samples  
110 where methanotrophs were recovered, their relative abundances ranged from  $1.1 \times 10^{-5}$  to  
111  $2.2 \times 10^{-2}$  ( $Q_1 = 5.4 \times 10^{-4}$ ,  $Q_2 = 2.3 \times 10^{-3}$ ,  $Q_3 = 4.7 \times 10^{-3}$ ). Cave methanotrophic communities  
112 were dominated by the Methylocystaceae, but members of the Methylococcales were also  
113 present (Figure 2). The median abundance of the Methylocystaceae at each site was 96 %  
114 of the total methanotrophic community. Members of the Methylocystaceae accounted for  
115 51 unique operational taxonomic units (OTUs). Unknown OTUs at the genus level  
116 accounted for 94 % of the OTUs and virtually all (99.99 %) of the observed sequences  
117 from the Methylocystaceae. The Methylococcales were more diverse than the  
118 Methylocystaceae with 69 unique OTUs but only contributed 997 DNA sequences. 21  
119 OTUs within the Methylococcales were identified from two undescribed families and  
120 accounted for 45 % of the total observed Methylococcales.

121           Methanotrophs from other clades constituted much less of the observed diversity.  
122 Seven OTUs were observed from the genus *Methylibium* (beta Proteobacteria:  
123 Comamonadaceae), and one DNA sequence from a member of the genus *Methylocella*  
124 (Beijerinckiaceae) was observed. Two OTUs were found from the family  
125 Acidimethylosilex (Verrucomicrobia) in Cave 2 in Indiana. We did not recover members  
126 from the candidate phylum NC10, or members of the USC methanotrophs.

127           **Environmental influences on community structure.** The CH<sub>4</sub> concentration in  
128 cave air was correlated with the relative abundance of methanotrophs. The relative  
129 abundances of both the Methylocystaceae ( $\log_{10}(\text{RA}) = -0.5 \pm 0.3 \times [\text{CH}_4] - 2.4 \pm 0.4$ ,  $r^2 =$

130 0.24,  $p = 1 * 10^{-3}$ ) and Methylococcales ( $\log_{10}(\text{RA}) = -0.5 \pm 0.2 * [\text{CH}_4] - 3.6 \pm 0.3$ ),  $r^2 =$   
131 0.41,  $p = 1 * 10^{-4}$ ) increased with decreasing  $\text{CH}_4$  concentration (Figure 2). An analysis of  
132 covariance (ANCOVA) test revealed that there was no significant difference between the  
133 slopes of the two clades (ANCOVA,  $F = 1.6$ ,  $p = 0.21$ ).

134 We investigated the influence of the amount of  $\text{CH}_4$ , gravel, sand, silt, and clay on  
135 methanotroph community composition using canonical correspondence analysis. As a  
136 whole, the composition of the methanotrophic community was not related to  
137 concentrations of  $\text{CH}_4$ , or the volumetric proportions of gravel, sand, silt, and clay at the  
138 sample locations. However, the community composition of the Methylococcales was  
139 related to  $\text{CH}_4$  concentrations in cave air (Canonical Correspondence Analysis,  $p = 0.001$ )  
140 and the amount of clay at the sample location ( $p = 0.008$ ) (Figure 4). OTUs within the total  
141 methanotrophic community and within Methylocystaceae were not related to any of the  
142 measured environmental parameters.

143 We tested if the proportions of gravel, sand, silt, and clay influenced the relative  
144 abundance of methanotrophs using Spearman's rank correlation tests. Methanotrophs from  
145 the Methylocystaceae, and thus of methanotrophic communities overall, were correlated  
146 with the volumetric abundance of gravel in a sample (Spearman's rank correlation,  
147 Methylocystaceae,  $\rho = 0.39$ ,  $S = 10231$ ,  $p = 0.02$ ) (Figure 3). The relative abundance of  
148 methanotrophs from the Methylocystaceae was not related to any other sediment size  
149 fraction present in the samples. Furthermore, the relative abundance of the  
150 Methylococcales was not related to any sediment size fraction (Spearman's rank  
151 correlations, vs. Gravel  $p = 0.7$ ; vs. Sand  $p = 0.12$ ; vs. Silt  $p = 0.76$ ; vs. Clay  $p = 0.90$ ).

152 We examined potential interactions between methanotrophs and other  
153 microorganisms by testing if the relative abundance of methanotrophs was related to the  
154 abundance of methylotrophs in caves. The relative abundance of methanotrophs was  
155 positively correlated to the relative abundance of methylotrophs in the sampled cave  
156 sediments (Spearman's rank correlation,  $\rho = 0.71$ ,  $S = 3849$ ,  $p = 1 \times 10^{-7}$ ) (Figure 5). The  
157 relative abundance of methylotrophs was not, however, related to CH<sub>4</sub> concentrations in  
158 cave air (Spearman's rank correlation,  $\rho = -0.25$ ,  $S = 8914$ ,  $p = 0.15$ ).

159 **Biogeographical influences on community structure.** We tested the ability of  
160 methanotrophs to disperse in the environment by measuring how the methanotroph  
161 community changed with measures of geographic distance. Cave methanotroph  
162 communities did not show significant relationships to measures of geographic distance.  
163 The relative abundance of methanotrophs was not correlated with the distance from a cave  
164 entrance (Spearman's rank correlation,  $\rho = 0.33$ ,  $S = 2432$ ,  $p = 0.08$ ). Furthermore,  
165 distance-decay analysis—a measure of how the spatial distance between two samples  
166 affects their similarity—of the total methanotrophic community assemblage was not  
167 statistically significant (Mantel test,  $r = 0.08$ ,  $p = 0.14$ ).

168 We also tested methanotroph dispersal by determining if a core group of  
169 methanotrophs was present in the samples. We defined a core community as taxa present  
170 in at least 60 % of samples. If no group of methanotrophs could consistently be found  
171 among caves, this may suggest that methanotrophs are dispersal limited. We observed a  
172 core methanotroph biome of 3 OTUs. All 3 OTUs were from unidentified genera in the  
173 Methylocystaceae. Together these taxa were present in 88 % of samples, and one OTU



174 was present in 86 % of all the samples. The core methanotroph biome accounted for 59 %  
175 of the obtained methanotroph sequences.

176

## 177 **DISCUSSION**

178 **Methanotroph community structure in caves.** Methanotrophs are widespread in  
179 cave environments. The dominance of the Methylocystaceae in cave methanotroph  
180 communities is consistent with observations that have been made in other low CH<sub>4</sub>  
181 environments. For example, high-affinity methanotrophs are observed to be dominant in  
182 aerated riparian environments, Arctic soils, and soils associated with basaltic rocks (5, 23,  
183 30, 31). Additionally, the relative abundance of methanotrophs observed in the sampled  
184 cave sediments is similar to the relative abundance of methanotrophs in Arctic soils (0.026  
185 to 0.589 %) (32), and from caves in Vietnam (9). However, we did not recover any USC  
186 methanotrophs as have been observed in some soils that consume atmospheric CH<sub>4</sub> (16,  
187 33). The lack of USC methanotrophs in our study contrasts with the methanotrophic  
188 community structure present in a cave from Australia where USC methanotrophs  
189 comprised 2 to 12 % of the community (10) and observations of USC- $\alpha$  methanotrophs in  
190 several caves (19). Additionally, our results are somewhat inconsistent with observations  
191 of methanotrophic communities from soils overlying caves in Australia where  
192 *Methylocella* sp. and *Crenothrix* sp. comprised 12 to 15 % of the community (12).

193 The cave sediments in our study also contained relatively rare methanotrophs, but  
194 the overall diversity of these taxa exceeded that of the dominant taxa. Minor contributors  
195 to the methanotroph community consisted of the Methylococcales, as well as  
196 methanotrophs from the Verrucomicrobia. The diversity of methanotrophs identified in our

197 study caves contrasts with the relatively depauperate assemblage found in a Spanish cave,  
198 which reportedly consisted of only three species, *Methylocapsa aurea*, *Methylomicrobium*  
199 *album*, and *Methylococcus capsulatus* (34). Our results suggest that CH<sub>4</sub> oxidation in  
200 caves may be carried out by a relatively diverse yet uncharacterized methanotrophic  
201 bacteria.

202 **Environmental influences on methanotroph communities.** The deterministic  
203 relationships between cave methanotrophs and their environment may be best understood  
204 from the perspective of metabolism. The process of life is fundamentally centered on  
205 obtaining energy from the surrounding environment and methanotrophs are no exception.  
206 Their distributions in caves appear to result from the fact that methanotrophs rely on both  
207 CH<sub>4</sub> and oxygen to derive energy.

208 The relative abundance of methanotrophs was inversely related to CH<sub>4</sub>  
209 concentrations in cave air. This pattern was documented for two major groups of  
210 methanotrophs, the Methylocystaceae and the Methylococcales. While the relative  
211 abundance of methanotrophs is sometimes known to positively track CH<sub>4</sub> concentrations  
212 (35), methanotrophs have been observed to be negatively correlated with CH<sub>4</sub>  
213 concentrations in some environments including glacial termini, geologic seeps, and a cave  
214 (10, 22, 30, 36). One explanation for the inverse CH<sub>4</sub>-methanotroph relationship is that  
215 methanotrophs are actively driving down CH<sub>4</sub> concentrations in locations where they make  
216 up a large fraction of the total microbial community. Another possibility is that  
217 methanotroph abundance in caves may be positively related to CH<sub>4</sub> fluxes, but our  
218 observed pattern is a result of seasonality in cave-air flow. Many caves are known to  
219 exhibit faster air flow when the external atmospheric temperature is lower than the

220 temperature of cave air. This leads to higher CH<sub>4</sub> concentrations in caves during the winter  
221 (13, 37). Our samples were acquired during summer, so it is possible that our sites  
222 experience higher CH<sub>4</sub> concentrations during the winter and thus greater CH<sub>4</sub> fluxes on an  
223 annual basis which may explain the observed negative relationship.

224         The permeability of cave sediments also appeared to influence the methanotroph  
225 community. The relative abundance of methanotrophs in caves was positively related to  
226 the amount of gravel in the samples. This may be due to the fact that cave sediments with  
227 greater portions of larger clasts, like gravel, may decrease the water-holding capacity while  
228 increasing the permeability of cave sediments and the diffusion of gasses (38). As the  
229 proportion of larger clasts in a matrix increases, the permeability of the sediment tends to  
230 increase (38). This gives methanotrophs greater access to CH<sub>4</sub> and O<sub>2</sub> which are crucial for  
231 their metabolism. Previous research observed that methanotrophs tend to be more  
232 abundant in silt and clay fractions of soils because these fractions made up the bulk of the  
233 soils themselves (24). This previous study did not characterize larger sediment sizes, nor  
234 did it examine clay floccules that may serve to enhance permeability.

235         The abundance of clay particles influenced the community composition of the  
236 Methylococcales (a less dominant group of methanotrophs in this study) as did the CH<sub>4</sub>  
237 concentration of cave air. These relationships suggest that members of the  
238 Methylococcales may be partitioning themselves across different niches with regard to  
239 CH<sub>4</sub> and O<sub>2</sub> availability. The Methylococcales are typically associated with environments  
240 that have low O<sub>2</sub> and high CH<sub>4</sub> concentrations. Members of Methylococcales may  
241 therefore be responding to dysoxic to hypoxic environments in cave sediments that result  
242 from tightly packed clay-sized particles and/or extra-atmospheric CH<sub>4</sub> sources (11, 13, 14).

243 The community gradient across CH<sub>4</sub> and clay particle size may represent the transition  
244 from potentially unknown members in the Methylococcales that consume CH<sub>4</sub> at low (i.e.  
245 atmospheric) concentrations to those more tolerant of lower O<sub>2</sub> concentrations.

246 Organisms alter the physical and chemical characteristics of the environment and  
247 thus may influence the distributions of other species in the environment. The positive  
248 correlation between methylotrophs and methanotrophs is consistent with observations of  
249 metabolic interactions between these functional groups of bacteria. For example,  
250 Methylotrophs are known to consume methanol that is produced by methanotrophs (39).  
251 Co-occurrences between members of Methylococcales and Methylophilaceae  
252 (methylotrophic) have been observed in environmental samples, and so has the transfer of  
253 methanol from methanotrophs to methylotrophs (40, 41). A similar process may be  
254 occurring in caves. Alternatively, methylotrophs may simply be responding to the presence  
255 of other organic compounds in cave air besides CH<sub>4</sub>. In addition to consuming methanol,  
256 methylotrophs are known to consume methyl halides, like methyl chloride and methyl  
257 bromide which are present as trace gases in the atmosphere (42). These gases would be  
258 advected into cave air in the same fashion as atmospheric CH<sub>4</sub> (43).

259 **Biogeography of methanotroph communities.** Methanotrophic communities did  
260 not show statistically significant relationships with local or regional assessments of  
261 geographic distance. The composition of methanotrophic communities close to cave  
262 entrances was not different compared to those in more interior locations. This pattern has  
263 several possible explanations, but two seem to be the most probable. The methanotrophic  
264 community in caves is dominated by Type II methanotrophs and these methanotrophs do  
265 best under environmental conditions of low CH<sub>4</sub> concentrations and high O<sub>2</sub>

266 concentrations. The change from about 2 to < 0.3 ppmv CH<sub>4</sub> in cave air may not impose  
267 strong selective pressure on Type II methanotrophs. Additionally, the lack of a pattern in  
268 methanotrophic community composition may be a result of the seasonality present in cave  
269 air (44, 45). Thus, CH<sub>4</sub> concentrations in cave air may be near the atmospheric  
270 concentration at one point in the year and shift to sub-atmospheric concentrations at other  
271 times. This could cause location to be a poor predictor of the methanotrophic assemblage  
272 due to microbial physiological states like dormancy (46).

273         Likewise, cave methanotrophic communities were not spatially autocorrelated at  
274 the regional scale. The lack of a distance-decay relationship in methanotrophic  
275 communities from the studied caves may indicate that the scale at which distance-decay  
276 relationships occur in these communities is larger than the regional scale of 500 km in our  
277 study. This may suggest that dispersal is high among methanotrophs.

278         We found a core group of three OTUs that were present in the studied caves. This  
279 suggests that high-affinity methanotrophs are able to move about the environment  
280 relatively easily. The fact that these methanotrophs accounted for 59 % of the observed  
281 methanotrophs suggests these organisms are reproducing in these environments as well.  
282 Previous observations are also indicative of high-dispersal capabilities for these organisms.  
283 For example, methanotrophs from a newly formed soil in Hawai'i showed close taxonomic  
284 affiliations with Arctic methanotrophs (5). Additionally, microbes are known to travel  
285 intercontinental distances on windblown dust (47), and perhaps windblown dust may carry  
286 methanotrophs into caves. Our results suggest that in cases where microorganisms derive  
287 part of their energetic and nutritional requirements from air, that barriers to dispersal into

288 other habitable subenvironments, like recurring slope lineae or caves on Mars (8, 48), may  
289 be decreased.

290

## 291 **CONCLUSIONS**

292 The structure of cave methanotroph communities appears to be best understood in  
293 terms of how cave subenvironments provide methanotrophs with access to CH<sub>4</sub> and  
294 oxygen. Cave methanotrophic communities showed relationships with cave-air CH<sub>4</sub>  
295 concentrations and the abundance of gravel-sized clasts in cave sediments. The CH<sub>4</sub>  
296 concentrations of cave air and the abundance of gravel both influence how much CH<sub>4</sub> and  
297 O<sub>2</sub> methanotrophs have access to. CH<sub>4</sub> is typically at low (i.e., atmospheric) concentrations  
298 in caves and as such, Methanotrophs from the Methylocystaceae were numerically  
299 dominant. This community structure mirrors that of other atmospheric CH<sub>4</sub> oxidizing  
300 communities (9, 32). Further, the community composition of the Methylococcales showed  
301 responses to CH<sub>4</sub> concentrations and the abundance of clay in cave sediments that could  
302 represent a transition from uncultivated members in the Methylococcales that consume  
303 CH<sub>4</sub> at low (i.e. atmospheric) concentrations to those more tolerant of lower O<sub>2</sub>  
304 concentrations.

305 Our results suggest that methanotrophs in caves have secondary influences on the  
306 cave-microbial community structure. The abundance of known methylotrophic organisms  
307 is correlated with the abundance of methanotrophs. This suggests that molecules produced  
308 along the methane oxidation pathway, like methanol, are leaked from methanotrophic cells

309 allowing for the growth of methyloproths. Our findings suggest that CH<sub>4</sub> may be an  
310 overlooked energy source for cave communities.

311 Methantrophs did not show relationships with measures of geographic distance in  
312 this study. This study focused on environments that are thought to present atmospheric to  
313 subatmospheric CH<sub>4</sub> concentrations year-round and in sediments that are forming from the  
314 breakdown of similar rocks. The similarity of the environments may be one reason for the  
315 observed lack a relationship with measures of distance. This result also suggests that the  
316 dispersal barrier for high-affinity methanotrophs from cave to cave may be low.

317

## 318 **MATERIALS AND METHODS**

319 **Microbial Sampling.** We sampled microbial communities from caves along the  
320 western front of the Appalachian fold and thrust belt, in intracratonic settings of the USA,  
321 and in the Sierra Madre of Mexico. We obtained 42 sediment samples from caves along  
322 transects from cave entrances to interiors. Samples were scraped from ~0.1 m<sup>2</sup> large areas  
323 of cave walls and floors using a spatula that had been sterilized with 70 volume % ethanol  
324 in water (49). Samples were stored on ice until they could be transferred to a -80 °C  
325 freezer.

326 **Environmental Parameters.** We measured multiple environmental parameters to  
327 assess factors that potentially influence the composition of cave methanotrophic  
328 communities. We measured CH<sub>4</sub> concentrations *in-situ* with Fourier Transform Infrared  
329 Spectroscopy (FTIR) (Gasetm DX4030 – Milton Keynes, United Kingdom), or in the  
330 laboratory with FTIR gas-chromatography (Varian – Agilent Technologies, Palo Alto,

331 California) using discrete air samples collected in the field. Some of the CH<sub>4</sub>  
332 concentrations listed in this study have been previously published (14, 50), and new data  
333 were collected according to methods reported in the same publications. In cases where  
334 cave maps were available, the distance from the nearest entrance to the sampling location  
335 was calculated along the length of the cave passages. Cave sediment grain-size  
336 distributions were measured with a Malvern Mastersizer 3000 (Malvern Instruments Inc.,  
337 Westborough Massachusetts). Raw data from the Mastersizer were converted to % gravel,  
338 % sand, % silt, and % clay sized particles by volume using the GRADISTAT software  
339 package (51). Metadata used for statistical analyses are reported in Supplemental Table 2.

340 **Molecular Techniques.** Genomic DNA was extracted from cave sediment samples  
341 with a MoBio PowerSoil™ extraction kit (MoBio, Carlsbad, California USA). About 10  
342 ng of extracted DNA was used as a template for amplification by polymerase chain  
343 reaction (PCR). The V4 region of the 16S rRNA gene was amplified using 515F and 806R  
344 with barcoded primers designed to work with the Illumina MiSeq platform (52). DNA  
345 amplification was performed using 50 µL reactions from each sample. PCR reactions were  
346 carried out by a 3 min denaturing step at 94 °C, followed by 30 cycles of 94 °C for 45 s, 50  
347 °C for 60 s, and 72 °C for 90 s. A final 10-minute extension was carried out at 72 °C.  
348 Quality of the PCR amplifications was checked by gel electrophoresis. Amplified DNA  
349 was cleaned using a commercial kit (Beckman Coulter Agencourt AMPure XP,  
350 Indianapolis, Indiana, USA). Cleaned DNA from the reactions was pooled to a final  
351 concentration of 20 ng per sample.

352 We sequenced the cleaned PCR amplicons using Illumina MiSeq technology  
353 (Illumina Reagent Kit v2, 500 reaction kit) at the Center for Bioinformatics and Genomics



354 at Indiana University. Data quality and unique sequences obtained from the PCR  
355 amplifications were analyzed using mothur (53). DNA sequence data were aligned using  
356 the Needleman algorithm. Sequences matching chimeras were removed using UCHIME  
357 (54). Sequences that matched chloroplasts, Archaea, and other non-bacterial sequences  
358 were also removed. OTUs were created by binning the data at 97 % sequence similarity.  
359 OTUs were identified using a SILVA reference database (version 128).

360 **Statistical Analyses.** The R computing environment was used for all quantitative  
361 analyses (55). We used 16S rRNA gene sequences to assess diversity and composition of  
362 the methanotroph community. Sequences related to known methanotrophs and  
363 methylotrophs were subset from the larger 16S rRNA dataset using the “subset\_taxa”  
364 function in the *phyloseq* software package to create OTU abundance tables and for only  
365 the taxa of interest for a particular sample (56). Relationships between methylotrophs and  
366 CH<sub>4</sub> concentrations were examined due to the similarities of their metabolic pathways with  
367 methanotrophs. We defined the methanotrophic community as members of the  
368 Methylocystaceae, Methylococcales, Methylocella, USC- $\alpha$ , and USC- $\gamma$  (17, 18). We  
369 defined the methylotrophic community as members of the Methylophilaceae and  
370 Methylobacteriaceae.

371 We assessed the relationships between methanotrophs and environmental  
372 conditions through a series of statistical analyses. Raw abundance data were transformed  
373 into fractional abundance data to avoid variations in the number of reads between samples.  
374 Community dissimilarity between samples was assessed with Bray-Curtis dissimilarity.  
375 Dissimilarity measures were only calculated if the number of OTUs in a phylogenetic  
376 grouping was greater than 100 OTUs to avoid statistical problems arising from small

377 sample size. The effect of CH<sub>4</sub> concentrations on the methanotrophic community was  
378 assessed using ANCOVA and Mantel tests. We tested the effect of sediment grain size on  
379 cave methanotrophic communities using canonical correspondence analysis that was  
380 performed in the R package *vegan* (57).

381         The spatial autocorrelation of methanotrophic communities was tested by  
382 performing distance-decay analyses. Distance-decay is a spatial-autocorrelation pattern  
383 that describes the decreasing similarity of biological communities with increases in  
384 geographic distance (58). We performed distance-decay analysis in R by first removing  
385 data from Cave 38 (Cueva de Villa Luz) since it was roughly 2000 km away from the  
386 nearest samples. We then tested for a distance-decay pattern using a Mantel test in the  
387 package *vegan* (57).

388         We characterized the methanotroph core microbiome, which is defined as a suite of  
389 members shared in an environment (59). We calculated the core microbiome based on a  
390 cutoff of 60 %, a value that is in the middle of ranges that have used when calculating core  
391 microbiomes in other ecosystems including corals and humans (60, 61). We also chose this  
392 value because it is larger than the majority of samples, but accounts for some  
393 unpredictability in an organism's distribution.

394         **Data and software availability.** All code and data used in this study can be found  
395 in a public GitHub repository (<https://github.com/websterkgd/CaveMethanotrophs>).

396

## 397 **ACKNOWLEDGEMENTS**

398         This material is based upon work supported by the U.S. Department of Energy,  
399 Office of Science, Office of Basic Energy Sciences under Award Number DE-SC0006978

400 to AS. Additional support was provided by a National Speleological Society research grant  
401 awarded to KDW, the National Geographic Society Expeditions Council (Grant #EC0644-  
402 13 to PJB), the National Science Foundation Dimensions of Biodiversity, Grant/Award  
403 Number: 1442246 to JTL, and a US Army Research Office, Grant/Award Number:  
404 W911NF-14-1-0411 to JTL. We thank Brent Lehmkuhl for microbiological support.  
405 Members of the Bloomington Indiana Grotto facilitated access to caves in Indiana and  
406 Kentucky. We thank Rodolfo Gómez Cruz for his support at Cueva de Villa Luz (Cave  
407 38). ML Larsen, MM Muscarella, and KJ Locey aided in data analysis and interpretation.  
408 LA Durden assisted in editing an early draft of this manuscript. The authors declare no  
409 conflicts of interest.

410

## 411 REFERENCES

- 412 1. Ciais P, Sabine C, Bala G. 2013. Carbon and other biogeochemical cycles, p. 465–  
413 570. *In* Stocker, TF, Qin, D, Pattner, G-K, Tignor, M, Allen, SK, Boschung, J,  
414 Nauels, A, Xia, X, Bex, V, Midgley, PM (eds.), *Climate Change 2013: The Physical*  
415 *Science Basis. Contribution of the Intergovernmental Panel on Climate Change.*  
416 Cambridge University Press, Cambridge, United Kingdom and New York, NY, USA.
- 417 2. Schimmelmann A, Ensminger SA, Drobniak A, Mastalerz M, Etiope G, Jacobi RD,  
418 Frankenberg C. 2018. Natural geological seepage of hydrocarbon gas in the  
419 Appalachian Basin and Midwest USA in relation to shale tectonic fracturing and  
420 past industrial hydrocarbon production. *Sci Total Environ* 644:982–993.
- 421 3. Webster CR, Mahaffy PR, Atreya SK, Moores JE, Flesch GJ, Malespin C, McKay

- 422 CP, Martinez G, Smith CL, Martin-Torres J, Gomez-Elvira J, Zorzano M-P, Wong  
423 MH, Trainer MG, Steele A, Acher Jr. D, Sutter B, Coll PJ, Freissinet C, Meslin P-  
424 Y, Gough R V., House CH, Pavlov A, Eigenbrode JL, Glavin DP, Pearson JC,  
425 Keymeulen D, Christensen LE, Schwenger SP, Navarro-Gonzalez R, Pla-Garía J,  
426 Rafkin SCR, Vicente-Retorillo Á, Kahanapää H, Viudez-Moreiras D, Smith MD,  
427 Harri A-M, Genzer M, Hassler DM, Lemmon M, Crisp J, Sander SP, Zurek RW,  
428 Vasavada AR. 2018. Background levels of methane in Mars' atmosphere show  
429 strong seasonal variations 360:1093–1096.
- 430 4. Kirschke S, Bousquet P, Ciais P, Saunois M, Canadell JG, Dlugokencky EJ,  
431 Bergamaschi P, Bergmann D, Blake DR, Bruhwiler L, Cameron-Smith P, Castaldi  
432 S, Chevallier F, Feng L, Fraser A, Heimann M, Hodson EL, Houweling S, Josse B,  
433 Fraser PJ, Krummel PB, Lamarque J-F, Langenfelds RL, Le Quéré C, Naik V,  
434 O'Doherty S, Palmer PI, Pison I, Plummer D, Poulter B, Prinn RG, Rigby M,  
435 Ringeval B, Santini M, Schmidt M, Shindell DT, Simpson IJ, Spahni R, Steele LP,  
436 Strode SA, Sudo K, Szopa S, van der Werf GR, Voulgarakis A, van Weele M,  
437 Weiss RF, Williams JE, Zeng G. 2013. Three decades of global methane sources  
438 and sinks. *Nat Geosci* 6:813–823.
- 439 5. King GM, Nanba K. 2008. Distribution of atmospheric methane oxidation and  
440 methanotrophic communities on hawaiian volcanic deposits and soils. *Microbes*  
441 *Environ* 23:326–330.
- 442 6. Degelmann DM, Borken W, Drake HL, Kolb S. 2010. Different atmospheric  
443 methane-oxidizing communities in european beech and norway spruce soils. *Appl*

- 444 Environ Microbiol 76:3228–3235.
- 445 7. Ford, Derek C; Williams P. 2013. Karst Hydrogeology and Geomorphology. Jon  
446 Wiley & Sons, London, England.
- 447 8. Cushing GE, Titus TN, Wynne JJ, Christensen PR. 2007. THEMIS observes  
448 possible cave skylights on Mars. Geophys Res Lett 34:4–8.
- 449 9. Lennon JT, Nguyễn-Thùy D, Phạm TM, Drobniak A, Tạ PH, Phạm NĐ, Streil T,  
450 Webster KD, Schimmelmann A. 2017. Microbial contributions to subterranean  
451 methane sinks. Geobiology 15:254–258.
- 452 10. Waring CL, Hankin SI, Griffith DWT, Kertesz MA, Kobylski V, Wilson NL,  
453 Coleman N V., Kettlewell G, Zlot R, Bosse M, Bell G. 2017. Seasonal total  
454 methane depletion in limestone caves. Sci Rep 7.
- 455 11. Matthey DP, Fisher R, Atkinson TC, Latin J-P, Durrell R, Ainsworth M, Lowry D,  
456 Fairchild IJ. 2013. Methane in underground air in Gibraltar karst. Earth Planet Sci  
457 Lett 374:71–80.
- 458 12. McDonough LK, Iverach CP, Beckmann S, Manefield M, Rau GC, Baker A, Kelly  
459 BFJ. 2016. Spatial variability of cave-air carbon dioxide and methane  
460 concentrations and isotopic compositions in a semi-arid karst environment. Environ  
461 Earth Sci 75:700.
- 462 13. Webster KD, Mirza A, Deli JM, Sauer PE, Schimmelmann A. 2016. Consumption  
463 of atmospheric methane in a limestone cave in Indiana, USA. Chem Geol 443:1–9.
- 464 14. Webster KD, Drobniak A, Etiope G, Mastalerz M, Sauer PE, Schimmelmann A.

- 465 2018. Subterranean karst environments as a global sink for atmospheric methane.  
466 Earth Planet Sci Lett 485:9–18.
- 467 15. Ricke P, Kube M, Nakagawa S, Erkel C, Reinhardt R, Liesack W. 2005. First  
468 genome data from uncultured upland soil cluster alpha methanotrophs provide  
469 further evidence for a close phylogenetic relationship to *Methylocapsa acidiphila*  
470 B2 and for high-affinity methanotrophy involving particulate methane  
471 monooxygenase. Appl Environ Microbiol 71:7472–7482.
- 472 16. Kolb S. 2009. The quest for atmospheric methane oxidizers in forest soils. Environ  
473 Microbiol Rep 1:336–346.
- 474 17. Nazaries L, Murrell JC, Millard P, Baggs L, Singh BK. 2013. Methane, microbes  
475 and models: fundamental understanding of the soil methane cycle for future  
476 predictions. Environ Microbiol 15:2395–2417.
- 477 18. Lau E, Nolan IV EJ, Dillard ZW, Dague RD, Semple A, Wentzell WL. 2015. High  
478 throughput sequencing to detect differences in methanotrophic Methylococcaceae  
479 and Methylocystaceae in surface peat, forest soil, and *Sphagnum* moss in  
480 Cranesville Swamp Preserve, West Virginia, USA. Microorganisms 3:113–136.
- 481 19. Pratscher J, Vollmers J, Wiegand S, Dumont MG, Kaster A-K. 2018. Unravelling  
482 the identity, metabolic potential and global biogeography of the atmospheric  
483 methane-oxidizing upland soil cluster  $\alpha$ . Environ Microbiol.
- 484 20. Edwards CR, Onstott TC, Miller JM, Wiggins JB, Wang W, Lee CK, Cary SC,  
485 Pointing SB, Lau MCY. 2017. Draft genome sequence of uncultured upland soil

- 486 cluster *Gammaproteobacteria* gives molecular insights into high-affinity  
487 methanotrophy. *Genome Announc* 5:e00047-17.
- 488 21. Bowman JP. 2005. *Methylococcales ord. nov.*, p. 248–270. *In* Brenner, D, Krieg, N,  
489 Staley, J, Garrity, G, Boone, D, De Vos, P, Goodfellow, M, Rainey, F, Schleifer, K-  
490 H (eds.), *Bergey’s Manual of Systematic Bacteriology*. Springer, Boston, MA.
- 491 22. Mills CT, Slater GF, Dias RF, Carr SA, Reddy CM, Schmidt R, Mandernack KW.  
492 2013. The relative contribution of methanotrophs to microbial communities and  
493 carbon cycling in soil overlying a coal-bed methane seep. *FEMS Microbiol Ecol*  
494 84:474–494.
- 495 23. Krause S, Meima-Franke M, Hefting MM, Bodelier PLE. 2013. Spatial patterns of  
496 methanotrophic communities along a hydrological gradient in a riparian wetland.  
497 *FEMS Microbiol Ecol* 86:59–70.
- 498 24. Bender M, Conrad R. 1994. Methane oxidation activity in various soils and  
499 freshwater sediments: Occurrence, characteristics, vertical profiles, and distribution  
500 on grain size fractions. *J Geophys Res* 99:16531–16540.
- 501 25. Sessitsch A, Weilharter A, Gerzabek MH, Kirchmann H, Kandeler E. 2001.  
502 Microbial population structures in soil particle size fractions of a long-term fertilizer  
503 field experiment. *Appl Environ Microbiol* 67:4215–4224.
- 504 26. Hemkemeyer M, Christensen BT, Martens R, Tebbe CC. 2015. Soil particle size  
505 fractions harbour distinct microbial communities and differ in potential for  
506 microbial mineralisation of organic pollutants. *Soil Biol Biochem* 90:255–265.

- 507 27. Veraart AJ, Garbeva P, van Beersum F, Ho A, Hordijk CA, Meima-Franke M,  
508 Zweers AJ, Bodelier PLE. 2018. Living apart together - Bacterial volatiles influence  
509 methanotrophic growth and activity. *ISME J* 12:1163–1166.
- 510 28. Gordon MS, Rosen DE. 1962. A cavernicolous form of the poeciliid fish *Poecilia*  
511 *sphenops* from Tabasco, Mexico. *Copeia* 1962:360–368.
- 512 29. Howarth FG. 1993. High-stress subterranean habitats and evolutionary change in  
513 cave-inhabiting arthropods. *Am Nat* 142:S65–S77.
- 514 30. Bárcena TG, Finster KW, Yde JC. 2011. Spatial patterns of soil development,  
515 methane oxidation, and methanotrophic diversity along a receding glacier forefield,  
516 Southeast Greenland. *Arctic, Antarct Alp Res* 43:178–188.
- 517 31. Lau MCY, Stackhouse BT, Layton AC, Chauhan A, Vishnivetskaya TA, Chourey  
518 K, Ronholm J, Mykytczuk NCS, Bennett PC, Lamarche-Gagnon G, Burton N,  
519 Pollard WH, Omelon CR, Medvigy DM, Hettich RL, Pfiffner SM, Whyte LG,  
520 Onstott TC. 2015. An active atmospheric methane sink in high Arctic mineral  
521 cryosols. *ISME J* 9:1880–1891.
- 522 32. Martineau C, Pan Y, Bodrossy L, Yergeau E, Whyte LG, Greer CW. 2014.  
523 Atmospheric methane oxidizers are present and active in Canadian high Arctic soils.  
524 *FEMS Microbiol Ecol* 89:257–269.
- 525 33. Lau E, Ahmad A, Steudler PA, Cavanaugh CM. 2007. Molecular characterization of  
526 methanotrophic communities in forest soils that consume atmospheric methane.  
527 *FEMS Microbiol Ecol* 60:490–500.



- 528 34. Fernandez-Cortes A, Cuezva S, Alvarez-Gallego M, Garcia-Anton E, Pla C,  
529 Benavente D, Jurado V, Saiz-Jimenez C, Sanchez-Moral S. 2015. Subterranean  
530 atmospheres may act as daily methane sinks. *Nat Commun* 6:7003.
- 531 35. Schütte UME, Cadieux SB, Hemmerich C, Pratt LM, White JR. 2016.  
532 Unanticipated geochemical and microbial community structure under seasonal ice  
533 cover in a dilute, dimictic Arctic lake. *Front Microbiol* 7:1–15.
- 534 36. Bárcena TG, Yde JC, Finster KW. 2010. Methane flux and high-affinity  
535 methanotrophic diversity along the chronosequence of a receding glacier in  
536 Greenland. *Ann Glaciol* 51:23–31.
- 537 37. Gregorič A, Zidanšek A, Vaupotič J. 2011. Dependence of radon levels in Postojna  
538 Cave on outside air temperature. *Nat Hazards Earth Syst Sci* 11:1523–1528.
- 539 38. Boadu FK. 2000. Hydraulic conductivity of soils from grain-size distribution: new  
540 models. *J Geotech Geoenvironmental Eng* 126:739–746.
- 541 39. Kalyuzhnaya MG, Martens-Habbena W, Wang T, Hackett M, Stolyar SM, Stahl  
542 DA, Lidstrom ME, Chistoserdova L. 2009. *Methylophilaceae* link methanol  
543 oxidation to denitrification in freshwater lake sediment as suggested by stable  
544 isotope probing and pure culture analysis. *Environ Microbiol Rep* 1:385–392.
- 545 40. Beck DAC, Kalyuzhnaya MG, Malfatti S, Tringe SG, Glavina del Rio T, Ivanova  
546 N, Lidstrom ME, Chistoserdova L. 2013. A metagenomic insight into freshwater  
547 methane-utilizing communities and evidence for cooperation between the  
548 *Methylococcaceae* and the *Methylophilaceae*. *PeerJ* 1:e23.

- 549 41. Xia F, Zou B, Shen C, Zhu T, Gao X-H, Quan Z-X. 2015. Complete genome  
550 sequence of *Methylophilus* sp. TWE2 isolated from methane oxidation enrichment  
551 culture of tap-water. J Biotechnol 211:121–122.
- 552 42. Michener JK, Vuilleumier S, Bringel F, Marx CJ. 2016. Transfer of a catabolic  
553 pathway for chloromethane in *Methylobacterium* strains highlights different  
554 limitations for growth with chloromethane or with dichloromethane. Front  
555 Microbiol 7:1116.
- 556 43. Barton HA, Taylor MR, Pace NR. 2004. Molecular phylogenetic analysis of a  
557 bacterial community in an oligotrophic cave environment. Geomicrobiol J 21:11–  
558 20.
- 559 44. Kowalczk AJ, Froelich PN. 2010. Cave air ventilation and CO<sub>2</sub> outgassing by  
560 radon-222 modeling: How fast do caves breathe? Earth Planet Sci Lett 289:209–  
561 219.
- 562 45. Gregorič A, Vaupotič J, Gabrovšek F. 2013. Reasons for large fluctuation of radon  
563 and CO<sub>2</sub> levels in a dead-end passage of a karst cave (Postojna Cave, Slovenia). Nat  
564 Hazards Earth Syst Sci 13:287–297.
- 565 46. Jones SE, Lennon JT. 2010. Evidence for limited microbial transfer of methane in a  
566 planktonic food web. Aquat Microb Ecol 58:45–53.
- 567 47. Barberán A, Ladau J, Leff JW, Pollard KS, Menninger HL, Dunn RR, Fierer N.  
568 2015. Continental-scale distributions of dust-associated bacteria and fungi. Proc  
569 Natl Acad Sci 112:5756–5761.

- 570 48. McEwen AS, Ojha L, Dundas CM, Mattson SS, Byrne S, Wray JJ, Cull SC,  
571 Murchie SL, Thomas N, Gulick VC. 2011. Seasonal flows on warm Martian slopes.  
572 *Science* (80- ) 333:740–743.
- 573 49. Pašić L, Kovče B, Sket B, Herzog-Velikonja B. 2010. Diversity of microbial  
574 communities colonizing the walls of a Karstic cave in Slovenia. *FEMS Microbiol*  
575 *Ecol* 71:50–60.
- 576 50. Webster KD, Rosales Lagarde L, Sauer PE, Schimmelmann A, Lennon JT, Boston  
577 PJ. 2017. Isotopic evidence for the migration of thermogenic methane into a sulfidic  
578 cave, Cueva de Villa Luz, Tabasco, Mexico. *J Cave Karst Stud* 79:24–34.
- 579 51. Blott SJ, Pye K. 2001. Gradistat: A grain size Ddtribution and statistics package for  
580 the analysis of unconolidated sediments. *Earth Surf Process Landforms* 26:1237–  
581 1248.
- 582 52. Caporaso JG, Lauber CL, Walters WA, Berg-Lyons D, Huntley J, Fierer N, Owens  
583 SM, Betley J, Fraser L, Bauer M, Gormley N, Gilbert JA, Smith G, Knight R. 2012.  
584 Ultra-high-throughput microbial community analysis on the Illumina HiSeq and  
585 MiSeq platforms. *ISME J* 6:1621–1624.
- 586 53. Schloss PD, Westcott SL, Ryabin T, Hall JR, Hartmann M, Hollister EB,  
587 Lesniewski RA, Oakley BB, Parks DH, Robinson CJ, Sahl JW, Stres B, Thallinger  
588 GG, Van Horn DJ, Weber CF. 2009. Introducing mothur: Open-source, platform-  
589 independent, community-supported software for describing and comparing  
590 microbial communities. *Appl Environ Microbiol* 75:7537–7541.

- 591 54. Edgar RC, Haas BJ, Clemente JC, Quince C, Knight R. 2011. UCHIME improves  
592 sensitivity and speed of chimera detection. *Bioinformatics* 27:2194–2200.
- 593 55. R Core Team. 2017. R: A language and environment for statistical computing. R  
594 Foundation for Statistical Computing, Vienna, Austria.
- 595 56. McMurdie PJ, Holmes S. 2013. Phyloseq: An R package for reproducible  
596 interactive analysis and graphics of microbiome census data. *PLoS One* 8:e61217.
- 597 57. Oksanen, J.; Blanchet, F.; Kindt, R.; Legendere, P.; Minchin, P.R.; O’Hara, R.B.O.;  
598 Simpson, G.L; Solymos, P.; Stevens, H.H.; Wagner H. 2018. Vegan: Community  
599 ecology package. R package version v 2.4-6.
- 600 58. Nekola JC, White PS. 1999. The distance decay of similarity in biogeography and  
601 ecology. *J Biogeogr* 26:867–878.
- 602 59. Shade A, Handelsman J. 2011. Beyond the Venn diagram: the hunt for a core  
603 microbiome. *Environ Microbiol* 14:4–12.
- 604 60. Björk JR, O’Hara RB, Ribes M, Coma R, Montoya JM. 2017. The dynamic core  
605 microbiome: structure, dynamics and stability. *bioRxiv* 137885.
- 606 61. Hernandez-Agrede A, Gates RD, Ainsworth TD. 2017. Defining the core  
607 microbiome in corals’ microbial soup. *Trends Microbiol* 25:125–140.
- 608 62. Weary DJ, Doctor DH. 2014. Karst in the United States: a digital map compilation  
609 and database. *United States Geol Surv Open-File Rep* 1156:1–23.

610

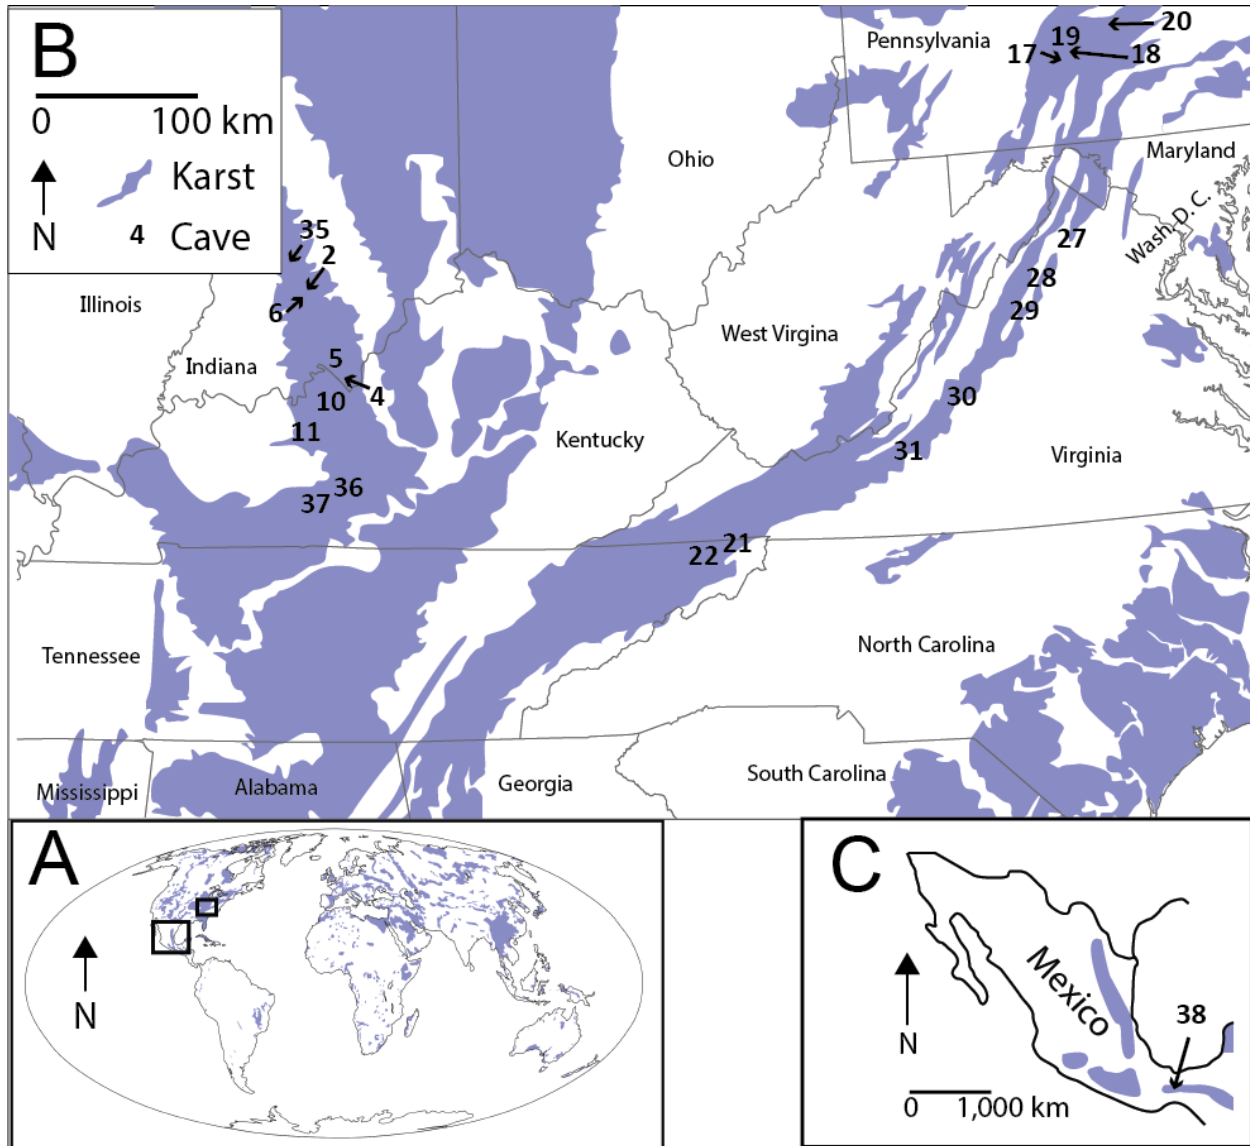

611

612 **Figure 1:** (A) Locations of karst at the global scale. Inserts show the occurrence of karst

613 (B) in the eastern United States (C) and in Mexico. Numbers represent the locations of

614 sampled caves in this study. Karst land cover data were obtained from (7, 62).

615

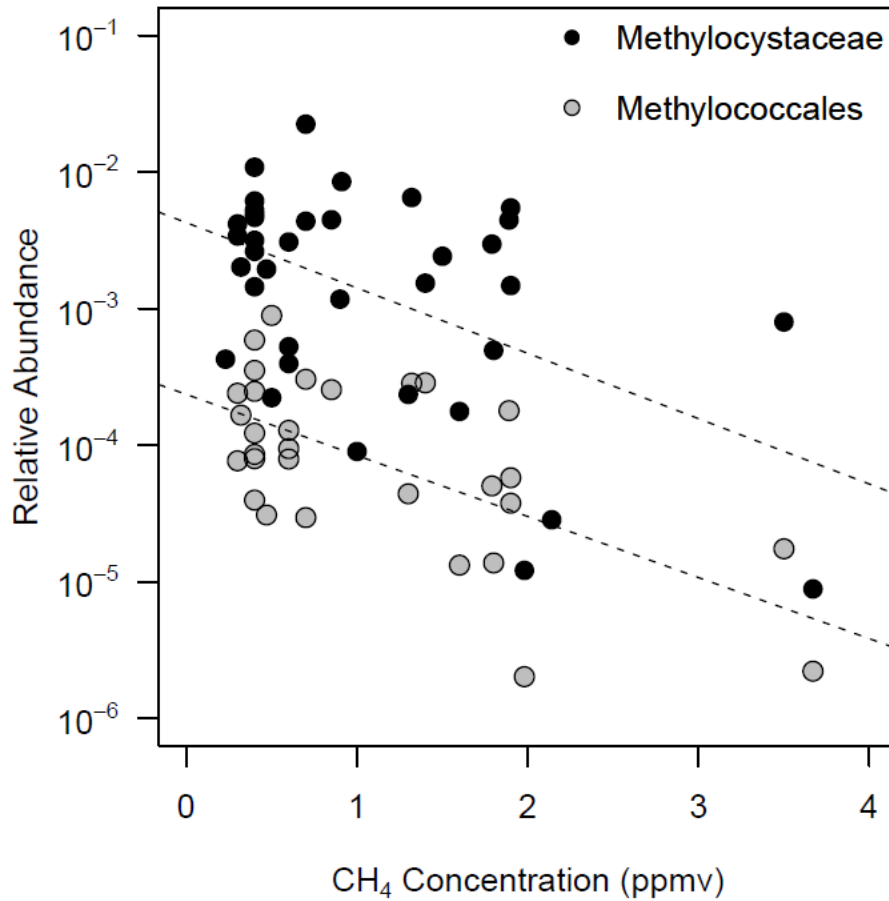

616

617 **Figure 2:** Relative abundances of methanotrophic community members plotted against the  
618 CH<sub>4</sub> concentration at each sample location. Members of the Methylocystaceae, typically  
619 associated with high-affinity methanotrophs, were more abundant than members from the  
620 Methylococcales, typically associated with low-affinity methanotrophs.

621

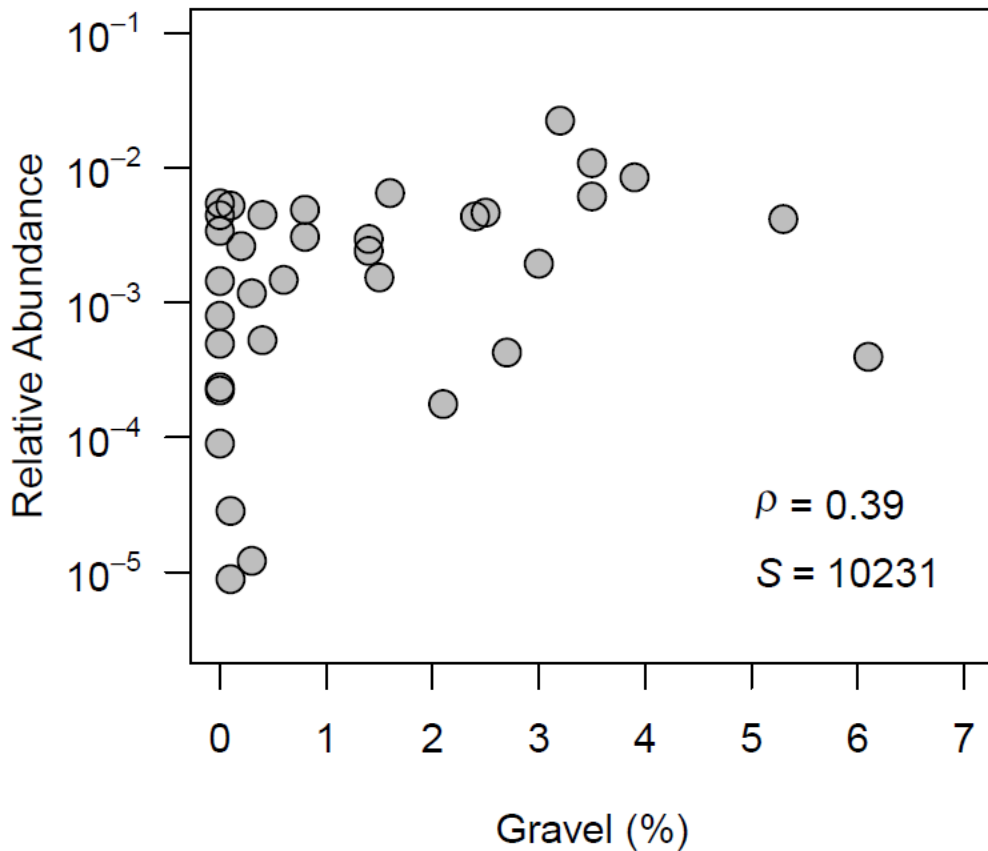

622

623 **Figure 3.** The relative abundance of methanotrophs from the Methylocystaceae plotted  
624 against the volumetric proportion of gravel in a sample (Spearman's rank correlation,  $p =$   
625 0.02).

626

627

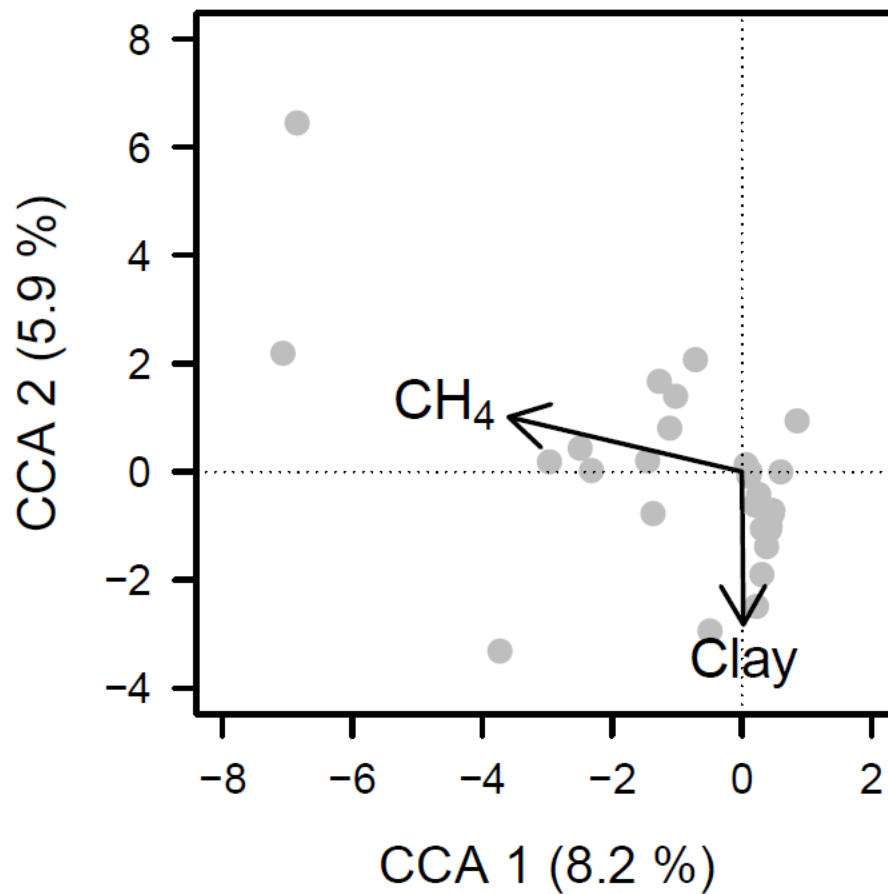

628

629 **Figure 4:** Canonical correspondence analysis of the community structure of the  
630 Methylococcales in caves. Community structure of this group was significantly related to  
631 clay content and CH<sub>4</sub> concentrations.

632



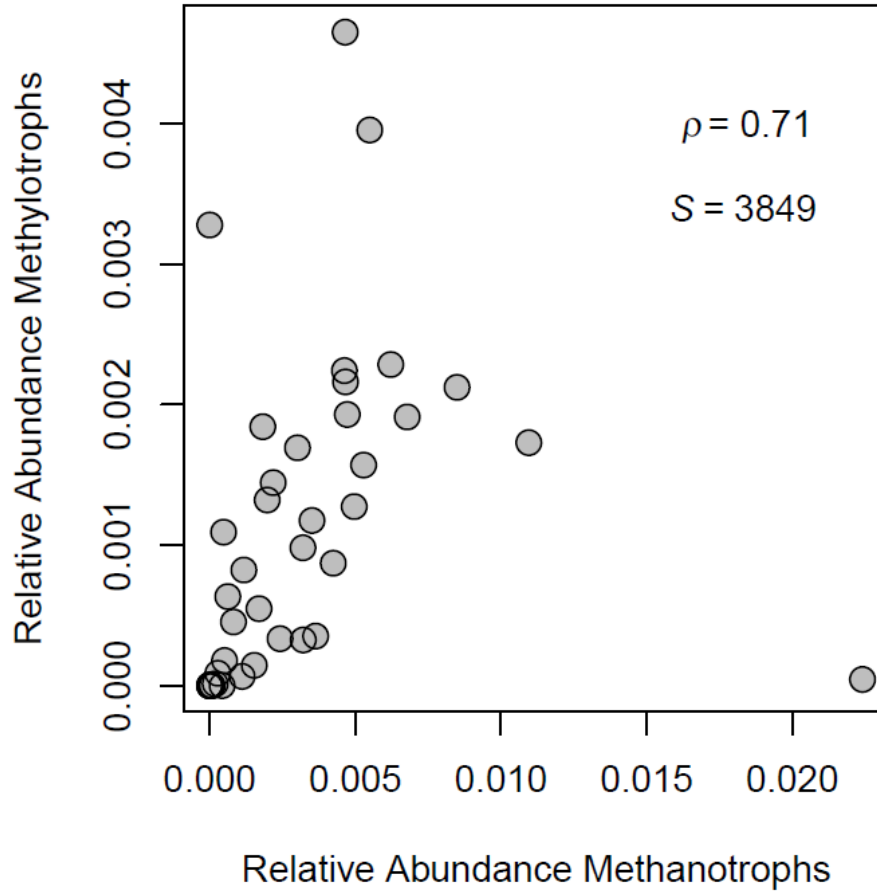

633

634 **Figure 5:** Relative abundance of methylotrophs plotted against the relative abundance of

635 methanotrophs from sampled caves (Spearman's rank correlation,  $p = 1 \times 10^{-7}$ ).

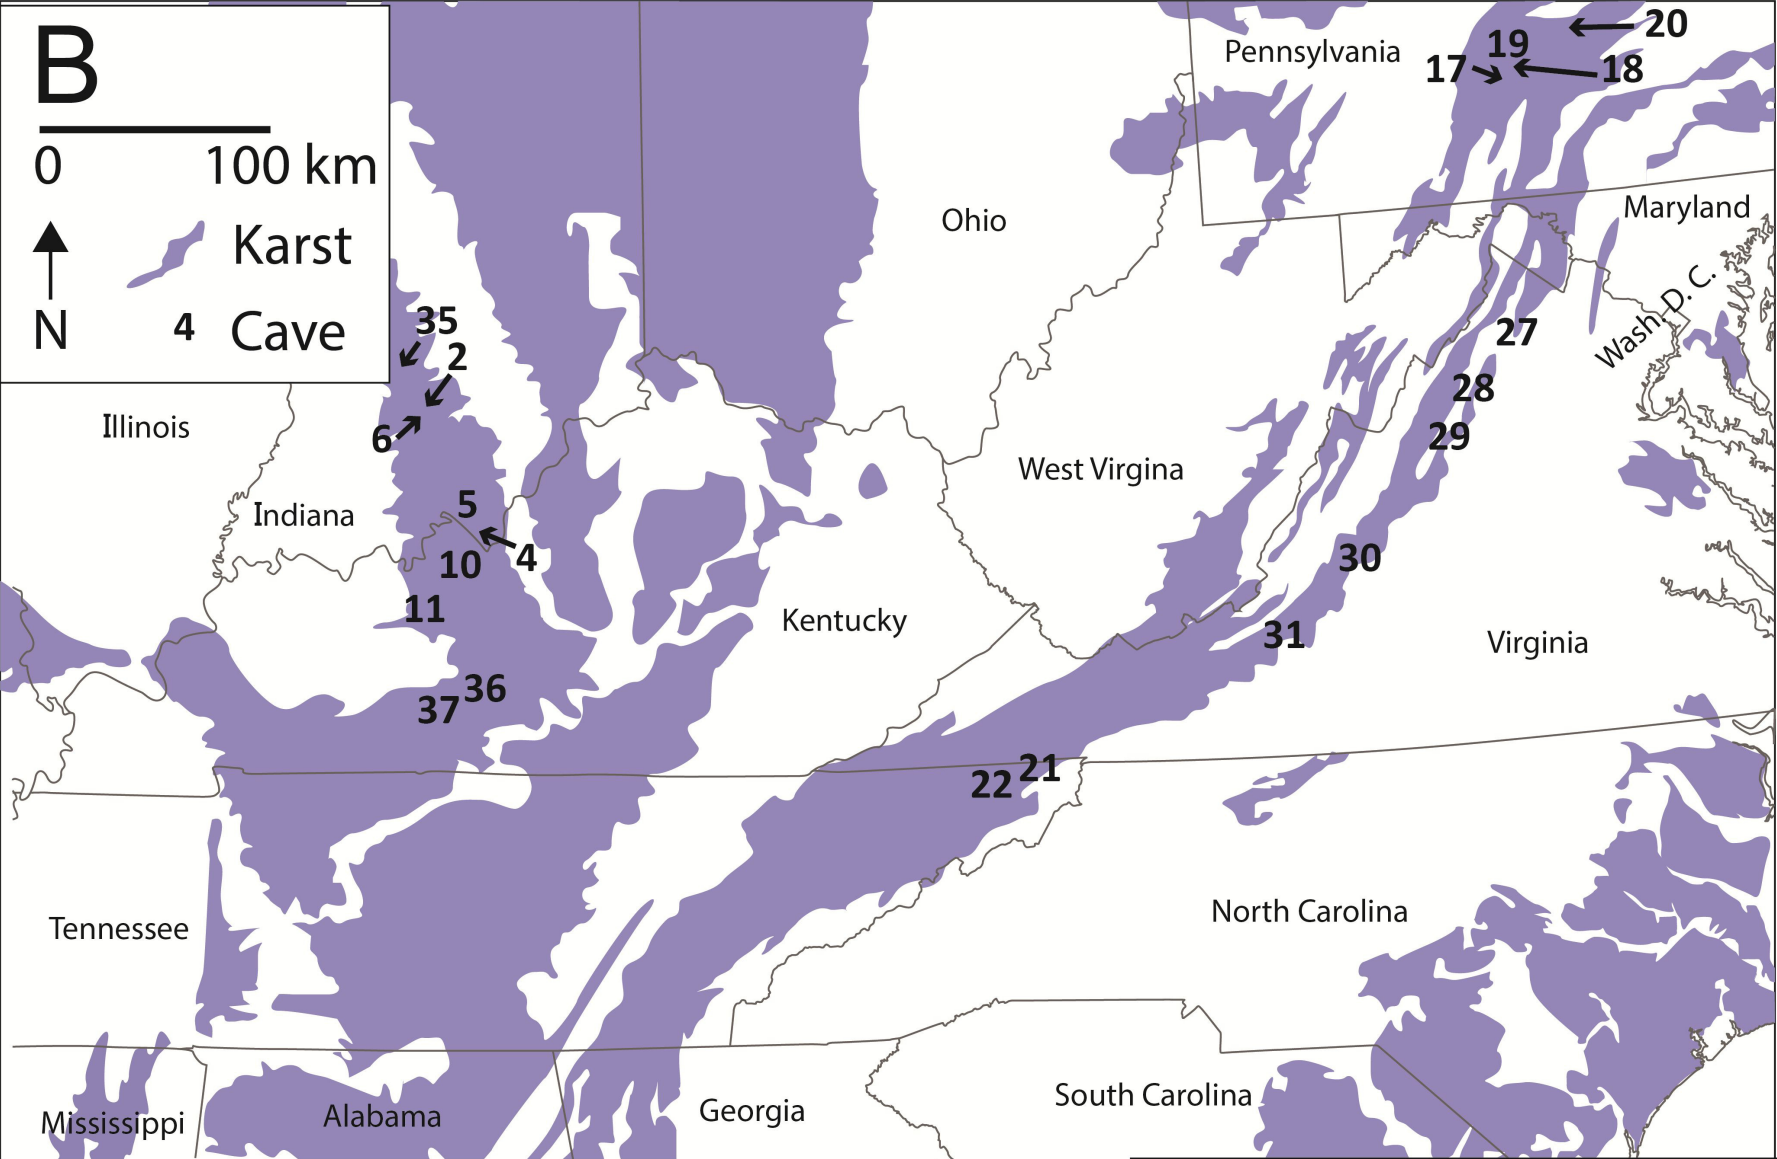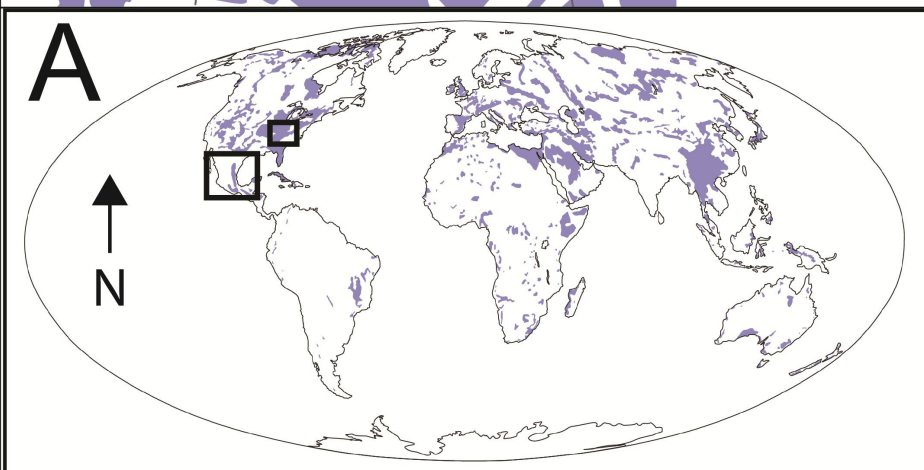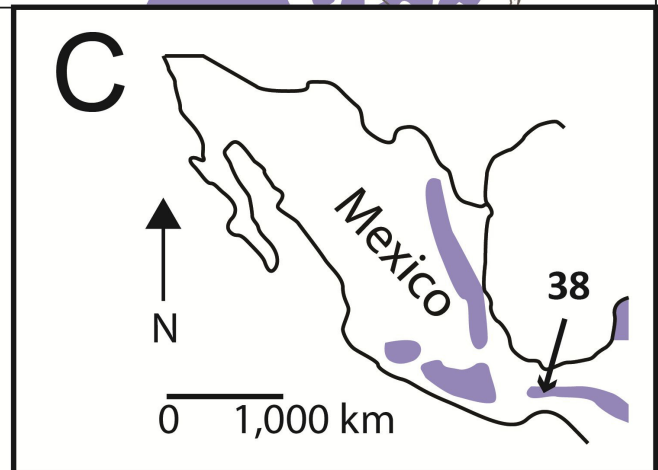

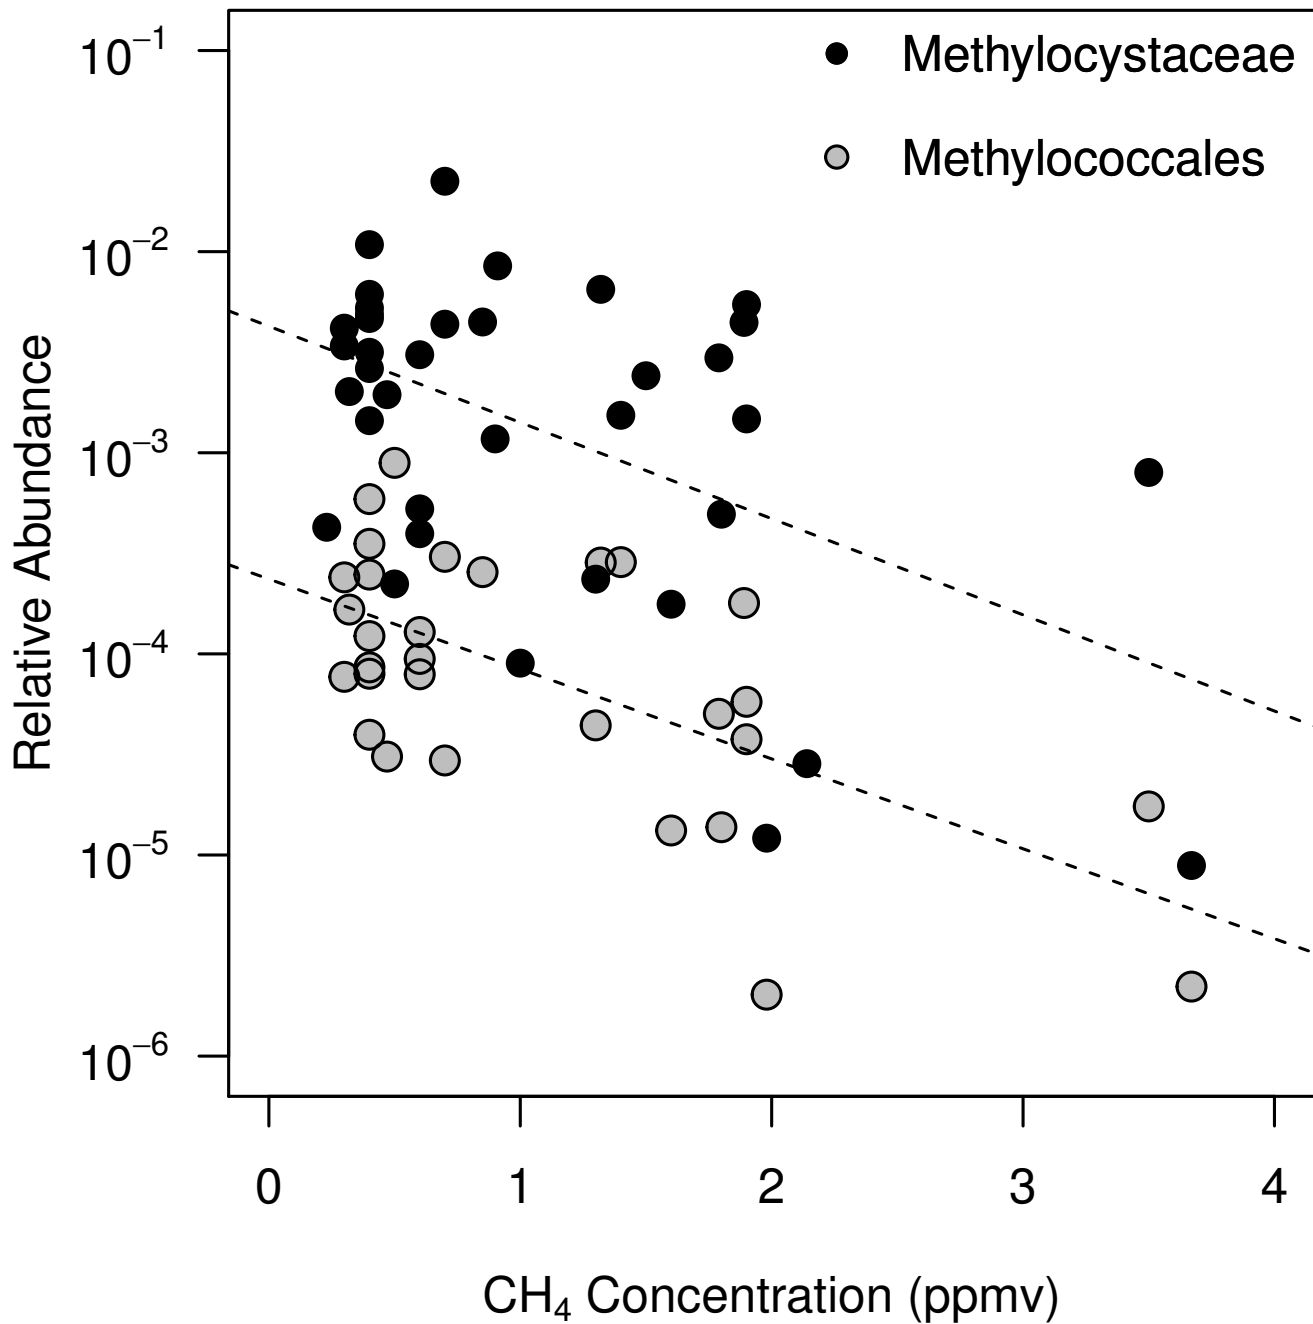

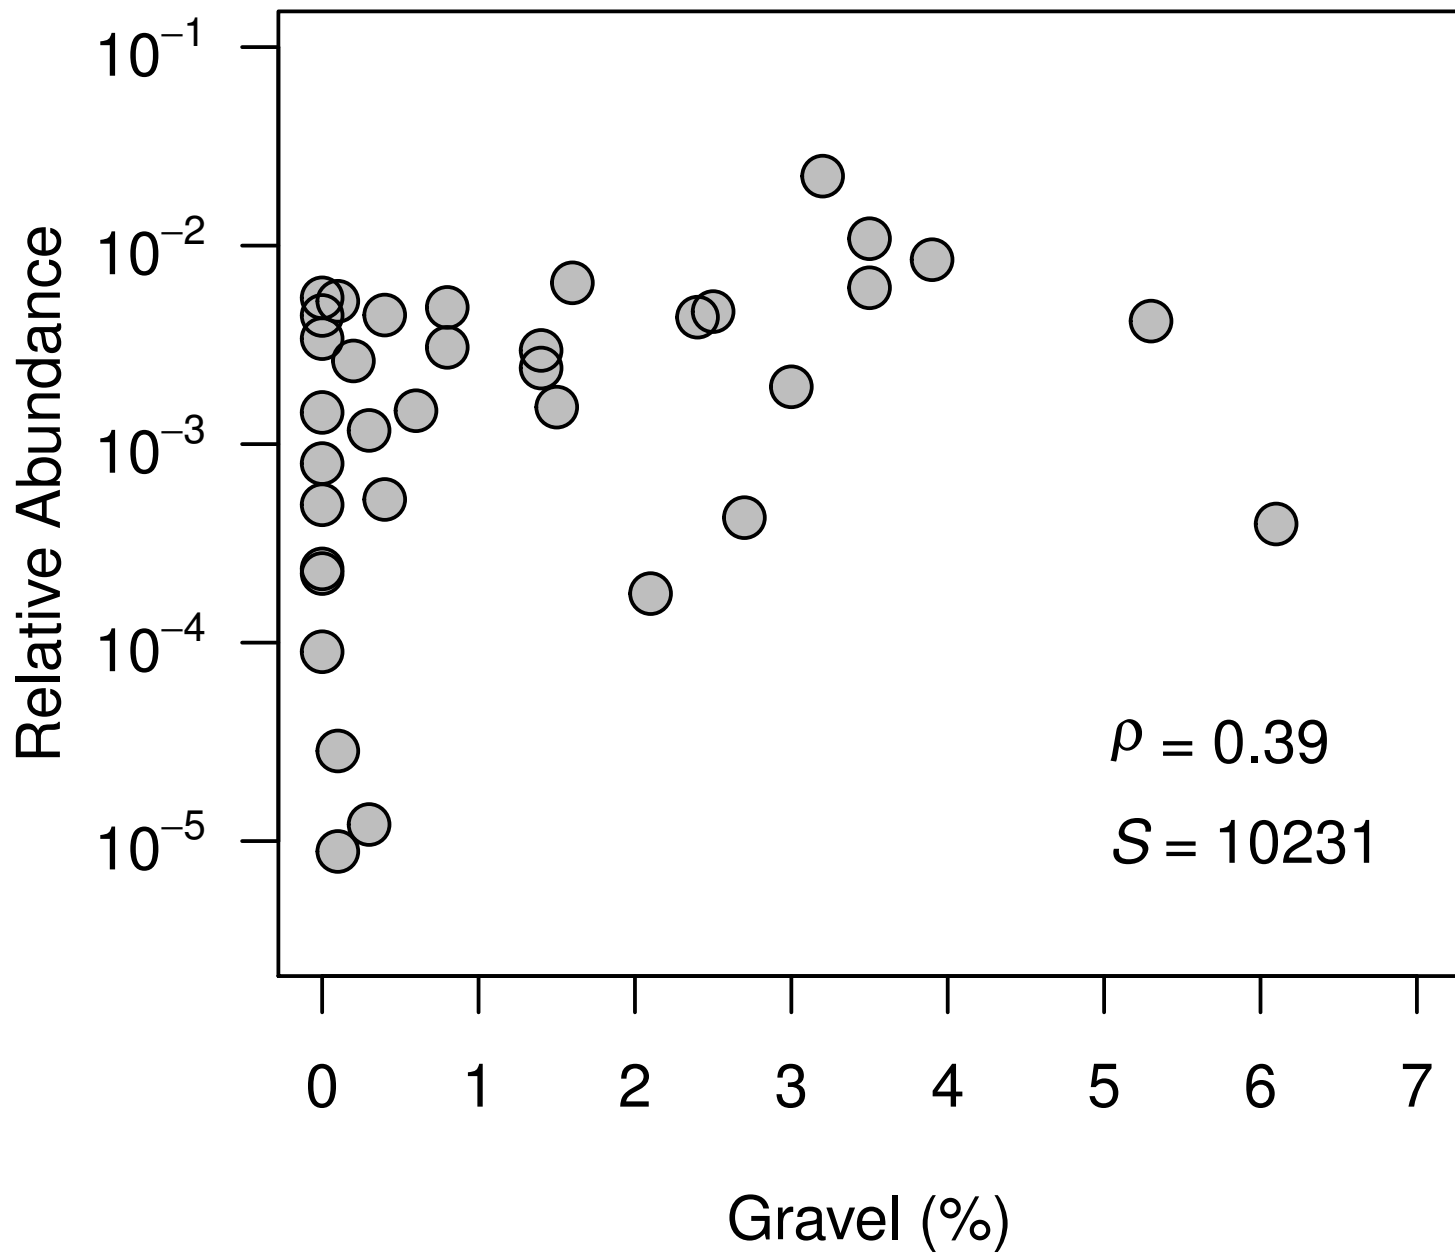

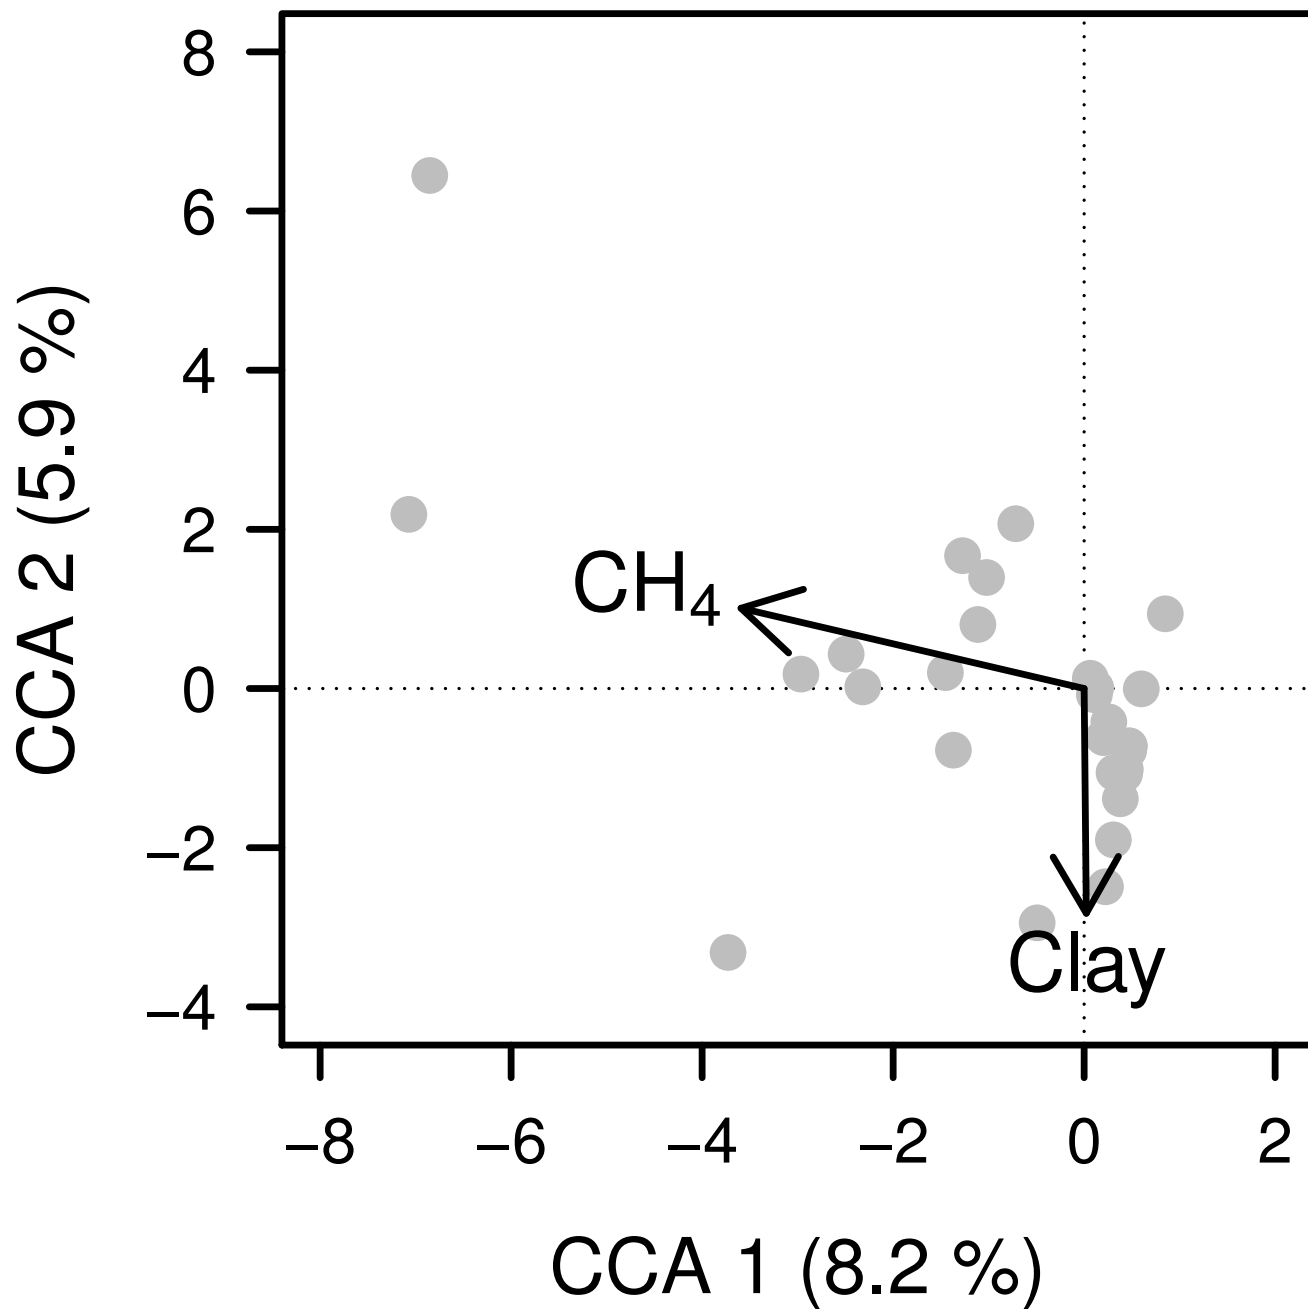

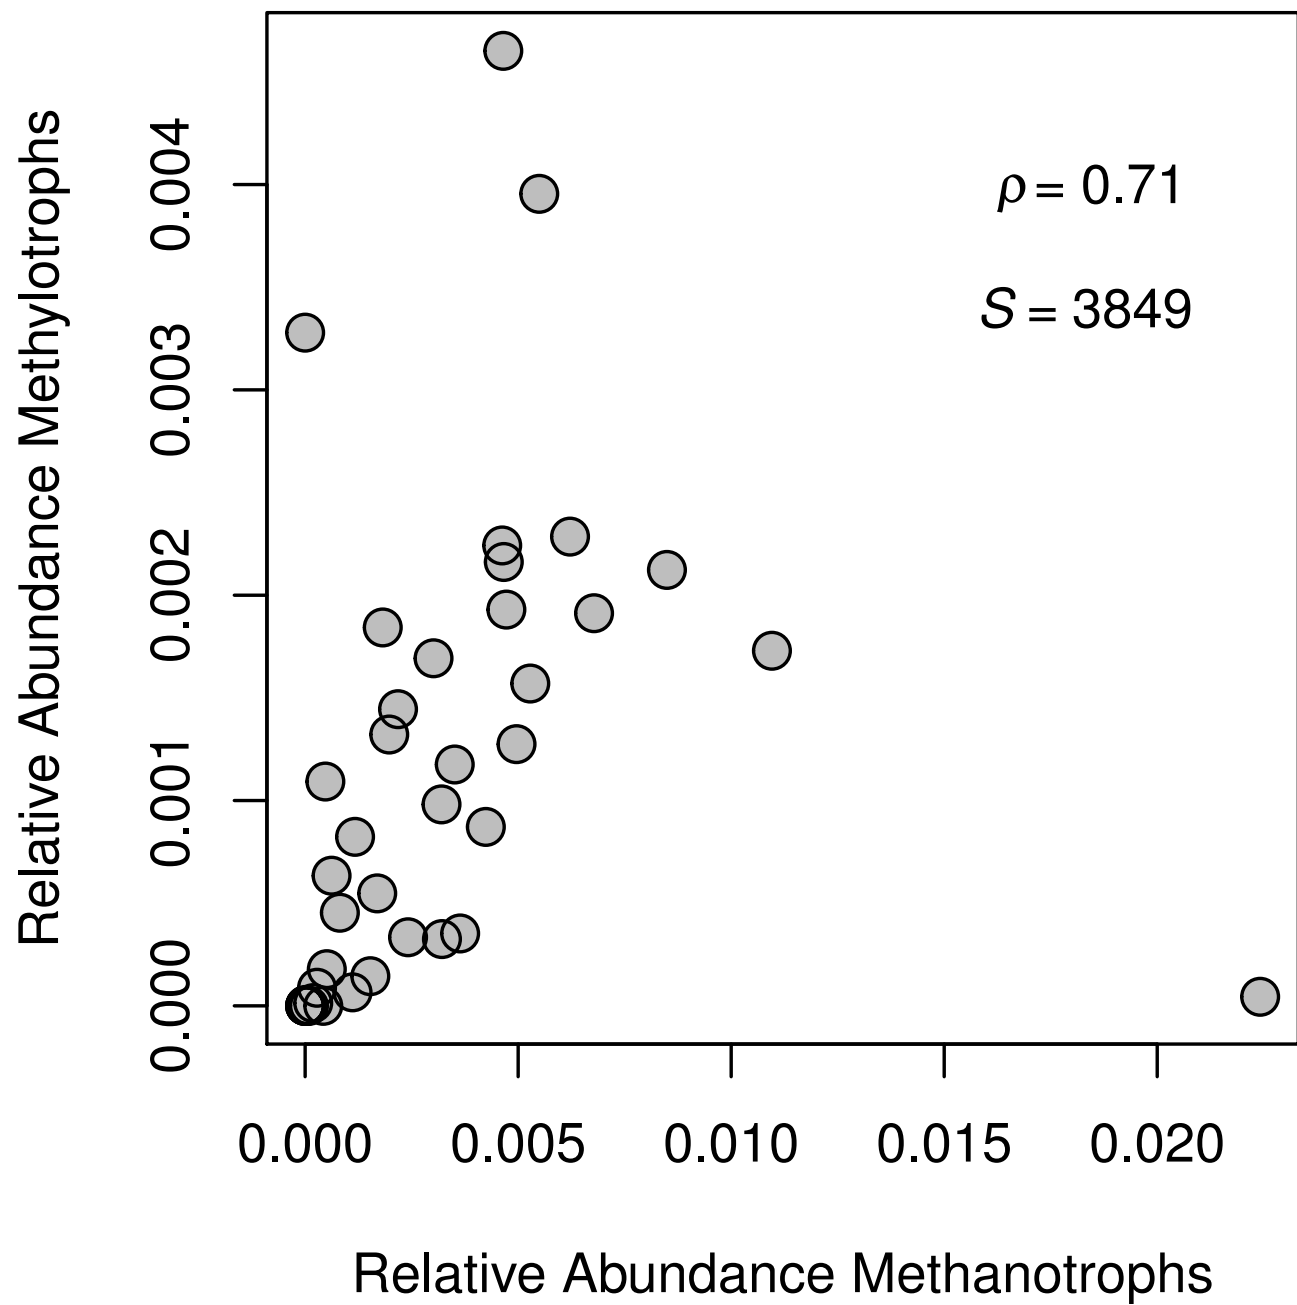

Source: https://www.biorxiv.org/content/10.1101/412213v1.full.pdf
